# Supplementary material
Source: ML conference proceedings conference paper supplement (https://proceedings.neurips.cc/paper_files/paper/2022/hash/4d6938f94ab47d32128c239a4bfedae0-Abstract.html)
Supplement: Supplementary file 1 [file 4d6938f94ab47d32128c239a4bfedae0-Supplemental-Conference.zip]

Archive with 63 entries (57 files):
- Supplementary material/
- Supplementary material/GAL__Gradient_Assisted_Learning_for_Decentralized_Multi_Organization_Collaborations_Appendix.pdf
- Supplementary material/README.md
- Supplementary material/requirements.txt
- Supplementary material/src/
- Supplementary material/src/assist.py
- Supplementary material/src/config.py
- Supplementary material/src/config.yml
- Supplementary material/src/data.py
- Supplementary material/src/datasets/
- Supplementary material/src/datasets/__init__.py
- Supplementary material/src/datasets/blob.py
- Supplementary material/src/datasets/bostonhousing.py
- Supplementary material/src/datasets/breastcancer.py
- Supplementary material/src/datasets/cifar.py
- Supplementary material/src/datasets/create_in_hospital_mortality.py
- Supplementary material/src/datasets/create_length_of_stay.py
- Supplementary material/src/datasets/diabetes.py
- Supplementary material/src/datasets/iris.py
- Supplementary material/src/datasets/mimic.py
- Supplementary material/src/datasets/mnist.py
- Supplementary material/src/datasets/modelnet.py
- Supplementary material/src/datasets/qsar.py
- Supplementary material/src/datasets/shapenet.py
- Supplementary material/src/datasets/utils.py
- Supplementary material/src/datasets/wine.py
- Supplementary material/src/logger.py
- Supplementary material/src/make.py
- Supplementary material/src/make_img.py
- Supplementary material/src/make_stats.py
- Supplementary material/src/metrics/
- Supplementary material/src/metrics/__init__.py
- Supplementary material/src/metrics/metrics.py
- Supplementary material/src/models/
- Supplementary material/src/models/__init__.py
- Supplementary material/src/models/conv.py
- Supplementary material/src/models/dl.py
- Supplementary material/src/models/interm.py
- Supplementary material/src/models/late.py
- Supplementary material/src/models/linear.py
- Supplementary material/src/models/linesearch.py
- Supplementary material/src/models/lstm.py
- Supplementary material/src/models/sk.py
- Supplementary material/src/models/stack.py
- Supplementary material/src/models/utils.py
- Supplementary material/src/models/vfl.py
- Supplementary material/src/modules/
- Supplementary material/src/modules/__init__.py
- Supplementary material/src/modules/modules.py
- Supplementary material/src/organization.py
- Supplementary material/src/privacy.py
- Supplementary material/src/process.py
- Supplementary material/src/summary.py
- Supplementary material/src/test.py
- Supplementary material/src/test_model_al.py
- Supplementary material/src/test_model_assist.py
- Supplementary material/src/test_model_baseline.py
- Supplementary material/src/test_model_vfl.py
- Supplementary material/src/train_model_al.py
- Supplementary material/src/train_model_assist.py
- Supplementary material/src/train_model_baseline.py
- Supplementary material/src/train_model_vfl.py
- Supplementary material/src/utils.py
