# Supplementary material
Source: ML conference proceedings conference paper supplement (https://proceedings.neurips.cc/paper_files/paper/2022/hash/4d6938f94ab47d32128c239a4bfedae0-Abstract.html)
Supplement: Supplementary file 1 [file 4d6938f94ab47d32128c239a4bfedae0-Supplemental-Conference.zip › Supplementary material/requirements.txt]

Pillow == 8.2.0
PyYAML == 5.4.1
anytree == 2.8.0
matplotlib == 3.3.2
numpy == 1.20.1
pandas == 1.1.3
scikit_learn == 0.24.1
six == 1.15.0
tabulate == 0.8.7
torch == 1.8.1
torchvision == 0.9.1
tqdm == 4.59.0
