# Supplementary material
Source: ML conference proceedings conference paper supplement (https://proceedings.neurips.cc/paper_files/paper/2022/hash/4d6938f94ab47d32128c239a4bfedae0-Abstract.html)
Supplement: Supplementary file 1 [file 4d6938f94ab47d32128c239a4bfedae0-Supplemental-Conference.zip › Supplementary material/src/config.py]

import yaml

global cfg
if 'cfg' not in globals():
    with open('config.yml', 'r') as f:
        cfg = yaml.load(f, Loader=yaml.FullLoader)


def process_args(args):
    for k in cfg:
        cfg[k] = args[k]
    if 'control_name' in args and args['control_name'] is not None:
        control_name_list = args['control_name'].split('_')
        control_keys_list = list(cfg['control'].keys())
        cfg['control'] = {control_keys_list[i]: control_name_list[i] for i in range(len(control_name_list))}
    if cfg['control'] is not None:
        cfg['control_name'] = '_'.join([str(cfg['control'][k]) for k in cfg['control']])
    return
