# Supplementary material
Source: ML conference proceedings conference paper supplement (https://proceedings.neurips.cc/paper_files/paper/2022/hash/4d6938f94ab47d32128c239a4bfedae0-Abstract.html)
Supplement: Supplementary file 1 [file 4d6938f94ab47d32128c239a4bfedae0-Supplemental-Conference.zip › Supplementary material/src/datasets/__init__.py]

from .blob import Blob
from .iris import Iris
from .diabetes import Diabetes
from .bostonhousing import BostonHousing
from .wine import Wine
from .breastcancer import BreastCancer
from .qsar import QSAR
from .mimic import MIMICL, MIMICM
from .mnist import MNIST
from .cifar import CIFAR10
from .modelnet import ModelNet40
from .shapenet import ShapeNet55
from .utils import *

__all__ = ('Blob', 'Iris', 'Diabetes', 'BostonHousing', 'Wine', 'BreastCancer', 'QSAR', 'MIMICL', 'MIMICM'
           'MNIST', 'CIFAR10', 'ModelNet40', 'ShapeNet55')
