# Supplementary material
Source: ML conference proceedings conference paper supplement (https://proceedings.neurips.cc/paper_files/paper/2022/hash/4d6938f94ab47d32128c239a4bfedae0-Abstract.html)
Supplement: Supplementary file 1 [file 4d6938f94ab47d32128c239a4bfedae0-Supplemental-Conference.zip › Supplementary material/src/models/__init__.py]

from .linear import *
from .conv import *
from .lstm import *
from .stack import *
from .linesearch import *
from .interm import *
from .late import *
from .vfl import *
from .dl import *
from .sk import *
