# Supplementary material
Source: ML conference proceedings conference paper supplement (https://proceedings.neurips.cc/paper_files/paper/2022/hash/4d6938f94ab47d32128c239a4bfedae0-Abstract.html)
Supplement: Supplementary file 1 [file 4d6938f94ab47d32128c239a4bfedae0-Supplemental-Conference.zip › Supplementary material/src/models/dl.py]

import copy
import torch
import torch.nn as nn
import numpy as np
from config import cfg
from .utils import init_param, normalize, loss_fn, feature_split, reset_parameters


class DL(nn.Module):
    def __init__(self, block, global_epoch, hidden_size, target_size):
        super().__init__()
        self.target_size = target_size
        self.block = copy.deepcopy(block)
        self.block.apply(reset_parameters)
        linear = []
        for i in range(global_epoch):
            linear.append(nn.Linear(hidden_size, target_size))
        self.linear = nn.ModuleList(linear)

    def forward(self, input):
        output = {'loss': 0}
        if cfg['data_name'] in ['MIMICL', 'MIMICM']:
            x = {'data': input['data'], 'length': input['length'], 'feature_split': input['feature_split']}
        else:
            x = {'data': input['data'], 'feature_split': input['feature_split']}
        x = self.block.feature(x)
        if cfg['data_name'] in ['MIMICL', 'MIMICM']:
            num_epochs = input['target'].size(2)
        else:
            num_epochs = input['target'].size(1)
        output_target = []
        input_target = []
        for i in range(num_epochs):
            output_target_i = self.linear[i](x)
            if cfg['data_name'] in ['MIMICL', 'MIMICM']:
                input_target_i = input['target'][:, :, i]
            else:
                input_target_i = input['target'][:, i]
            if cfg['data_name'] in ['ModelNet40', 'ShapeNet55']:
                input_target_i = input_target_i.repeat(12 // cfg['num_users'], 1)
            if 'loss_mode' in input:
                output['loss'] += loss_fn(output_target_i, input_target_i, loss_mode=input['loss_mode'])
            else:
                output['loss'] += loss_fn(output_target_i, input_target_i)
            output_target.append(output_target_i)
            input_target.append(input_target_i)
        if cfg['data_name'] in ['MIMICL', 'MIMICM']:
            output['target'] = torch.stack(output_target, dim=2)
            input['target'] = torch.stack(input_target, dim=2)
        else:
            output['target'] = torch.stack(output_target, dim=1)
            input['target'] = torch.stack(input_target, dim=1)
        return output


def dl(block, hidden_size):
    global_epoch = cfg['global_epoch']
    target_size = cfg['target_size']
    model = DL(block, global_epoch, hidden_size, target_size)
    model.apply(init_param)
    return model
