# Supplementary material
Source: ML conference proceedings conference paper supplement (https://proceedings.neurips.cc/paper_files/paper/2022/hash/4d6938f94ab47d32128c239a4bfedae0-Abstract.html)
Supplement: Supplementary file 1 [file 4d6938f94ab47d32128c239a4bfedae0-Supplemental-Conference.zip › Supplementary material/src/models/linesearch.py]

import torch
import torch.nn as nn
from .utils import loss_fn


class LineSearch(nn.Module):
    def __init__(self):
        super().__init__()
        self.assist_rate = nn.Parameter(torch.ones(1))

    def forward(self, input):
        output = {}
        output['loss'] = loss_fn(input['history'] + self.assist_rate * input['output'], input['target'])
        return output


def linesearch():
    model = LineSearch()
    return model
