# Supplementary material
Source: ML conference proceedings conference paper supplement (https://proceedings.neurips.cc/paper_files/paper/2022/hash/4d6938f94ab47d32128c239a4bfedae0-Abstract.html)
Supplement: Supplementary file 1 [file 4d6938f94ab47d32128c239a4bfedae0-Supplemental-Conference.zip › Supplementary material/src/summary.py]

import argparse
from collections import OrderedDict
import models
import os
from config import cfg
from tabulate import tabulate
import torch
import torch.nn as nn
import torch.backends.cudnn as cudnn
import numpy as np
from data import fetch_dataset, make_data_loader
from utils import save, makedir_exist_ok, to_device, process_control, process_dataset, collate

os.environ['TF_CPP_MIN_LOG_LEVEL'] = '3'
cudnn.benchmark = True
parser = argparse.ArgumentParser(description='cfg')
for k in cfg:
    exec('parser.add_argument(\'--{0}\', default=cfg[\'{0}\'], type=type(cfg[\'{0}\']))'.format(k))
parser.add_argument('--control_name', default=None, type=str)
args = vars(parser.parse_args())
for k in cfg:
    cfg[k] = args[k]
if args['control_name']:
    cfg['control'] = {k: v for k, v in zip(cfg['control'].keys(), args['control_name'].split('_'))} \
        if args['control_name'] != 'None' else {}
cfg['control_name'] = '_'.join([cfg['control'][k] for k in cfg['control']])


def main():
    process_control()
    cfg['seed'] = 0
    cfg['batch_size'] = {'train': 1, 'test': 1}
    runExperiment()
    return


def runExperiment():
    dataset = fetch_dataset(cfg['data_name'])
    process_dataset(dataset)
    data_loader = make_data_loader(dataset, cfg['model_name'])
    model = eval('models.{}().to(cfg["device"])'.format(cfg['model_name']))
    summary = summarize(data_loader['train'], model)
    content, total = parse_summary(summary)
    print(content)
    save_result = total
    save_tag = '{}_{}_{}'.format(cfg['data_name'], cfg['model_name'], cfg['control_name'])
    save(save_result, './output/result/{}.pt'.format(save_tag))
    return


def make_size(input, output):
    if isinstance(input, tuple):
        return make_size(input[0], output)
    if isinstance(output, tuple):
        return make_size(input, output[0])
    input_size, output_size = list(input.size()), list(output.size())
    return input_size, output_size


def make_flops(module, input, output):
    if isinstance(input, tuple):
        return make_flops(module, input[0], output)
    if isinstance(output, tuple):
        return make_flops(module, input, output[0])
    flops = compute_flops(module, input, output)
    return flops


def summarize(data_loader, model):
    def register_hook(module):

        def hook(module, input, output):
            module_name = str(module.__class__.__name__)
            if module_name not in summary['count']:
                summary['count'][module_name] = 1
            else:
                summary['count'][module_name] += 1
            key = str(hash(module))
            if key not in summary['module']:
                summary['module'][key] = OrderedDict()
                summary['module'][key]['module_name'] = '{}_{}'.format(module_name, summary['count'][module_name])
                summary['module'][key]['input_size'] = []
                summary['module'][key]['output_size'] = []
                summary['module'][key]['params'] = {}
                summary['module'][key]['flops'] = make_flops(module, input, output)
            input_size, output_size = make_size(input, output)
            summary['module'][key]['input_size'].append(input_size)
            summary['module'][key]['output_size'].append(output_size)
            for name, param in module.named_parameters():
                if param.requires_grad:
                    if name in ['weight', 'in_proj_weight', 'out_proj.weight']:
                        if name not in summary['module'][key]['params']:
                            summary['module'][key]['params'][name] = {}
                            summary['module'][key]['params'][name]['size'] = list(param.size())
                            summary['module'][key]['coordinates'] = []
                            summary['module'][key]['params'][name]['mask'] = torch.zeros(
                                summary['module'][key]['params'][name]['size'], dtype=torch.long,
                                device=cfg['device'])
                    elif name in ['bias', 'in_proj_bias', 'out_proj.bias']:
                        if name not in summary['module'][key]['params']:
                            summary['module'][key]['params'][name] = {}
                            summary['module'][key]['params'][name]['size'] = list(param.size())
                            summary['module'][key]['params'][name]['mask'] = torch.zeros(
                                summary['module'][key]['params'][name]['size'], dtype=torch.long,
                                device=cfg['device'])
                    else:
                        continue
            if len(summary['module'][key]['params']) == 0:
                return
            for name in summary['module'][key]['params']:
                summary['module'][key]['params'][name]['mask'] += 1
            return

        if not isinstance(module, nn.Sequential) and not isinstance(module, nn.ModuleList) \
                and not isinstance(module, nn.ModuleDict) and module != model:
            hooks.append(module.register_forward_hook(hook))
        return

    run_mode = True
    summary = OrderedDict()
    summary['module'] = OrderedDict()
    summary['count'] = OrderedDict()
    hooks = []
    model.train(run_mode)
    model.apply(register_hook)
    for i, input in enumerate(data_loader):
        input = collate(input)
        input = to_device(input, cfg['device'])
        model(input)
        break
    for h in hooks:
        h.remove()
    summary['total_num_params'] = 0
    summary['total_num_flops'] = 0
    for key in summary['module']:
        num_params = 0
        num_flops = 0
        for name in summary['module'][key]['params']:
            num_params += (summary['module'][key]['params'][name]['mask'] > 0).sum().item()
            num_flops += summary['module'][key]['flops']
        summary['total_num_params'] += num_params
        summary['total_num_flops'] += num_flops
    summary['total_space'] = summary['total_num_params'] * 32. / 8 / (1024 ** 2.)
    return summary


def divide_by_unit(value):
    if value > 1e9:
        return '{:.6} G'.format(value / 1e9)
    elif value > 1e6:
        return '{:.6} M'.format(value / 1e6)
    elif value > 1e3:
        return '{:.6} K'.format(value / 1e3)
    return '{:.6}'.format(value / 1.0)


def parse_summary(summary):
    content = ''
    headers = ['Module Name', 'Input Size', 'Weight Size', 'Output Size', 'Parameters', 'FLOPs']
    records = []
    for key in summary['module']:
        if not summary['module'][key]['params']:
            continue
        module_name = summary['module'][key]['module_name']
        input_size = str(summary['module'][key]['input_size'])
        weight_size = str(summary['module'][key]['params']['weight']['size']) if (
                'weight' in summary['module'][key]['params']) else 'N/A'
        output_size = str(summary['module'][key]['output_size'])
        num_params = 0
        for name in summary['module'][key]['params']:
            num_params += (summary['module'][key]['params'][name]['mask'] > 0).sum().item()
        num_flops = divide_by_unit(summary['module'][key]['flops'])
        records.append([module_name, input_size, weight_size, output_size, num_params, num_flops])
    total_num_param = '{} ({})'.format(summary['total_num_params'], divide_by_unit(summary['total_num_params']))
    total_num_flops = '{} ({})'.format(summary['total_num_flops'], divide_by_unit(summary['total_num_flops']))
    total_space = summary['total_space']
    total = {'num_params': summary['total_num_params'], 'num_flops': summary['total_num_flops'],
             'space': summary['total_space']}
    table = tabulate(records, headers=headers, tablefmt='github')
    content += table + '\n'
    content += '================================================================\n'
    content += 'Total Number of Parameters: {}\n'.format(total_num_param)
    content += 'Total Number of FLOPs: {}\n'.format(total_num_flops)
    content += 'Total Space (MB): {:.2f}\n'.format(total_space)
    makedir_exist_ok('./output')
    content_file = open('./output/summary.md', 'w')
    content_file.write(content)
    content_file.close()
    return content, total


def compute_flops(module, inp, out):
    if isinstance(module, nn.Conv2d):
        return compute_Conv2d_flops(module, inp, out)
    elif isinstance(module, (nn.BatchNorm2d, nn.InstanceNorm2d, nn.LayerNorm)):
        return compute_Norm_flops(module, inp, out)
    elif isinstance(module, (nn.AvgPool2d, nn.MaxPool2d)):
        return compute_Pool2d_flops(module, inp, out)
    elif isinstance(module, (nn.ReLU, nn.ReLU6, nn.PReLU, nn.ELU, nn.LeakyReLU, nn.GELU)):
        return compute_ReLU_flops(module, inp, out)
    elif isinstance(module, nn.Upsample):
        return compute_Upsample_flops(module, inp, out)
    elif isinstance(module, nn.Linear):
        return compute_Linear_flops(module, inp, out)
    else:
        print(f"[Flops]: {type(module).__name__} is not supported!")
        return 0
    pass


def compute_Conv2d_flops(module, inp, out):
    assert isinstance(module, nn.Conv2d)
    assert len(inp.size()) == 4 and len(inp.size()) == len(out.size())
    batch_size = inp.size()[0]
    in_c = inp.size()[1]
    k_h, k_w = module.kernel_size
    out_c, out_h, out_w = out.size()[1:]
    groups = module.groups
    filters_per_channel = out_c // groups
    conv_per_position_flops = k_h * k_w * in_c * filters_per_channel
    active_elements_count = batch_size * out_h * out_w
    total_conv_flops = conv_per_position_flops * active_elements_count
    bias_flops = 0
    if module.bias is not None:
        bias_flops = out_c * active_elements_count
    total_flops = total_conv_flops + bias_flops
    return total_flops


def compute_Norm_flops(module, inp, out):
    assert isinstance(module, (nn.BatchNorm2d, nn.InstanceNorm2d, nn.LayerNorm))
    norm_flops = np.prod(inp.shape).item()
    if isinstance(module, (nn.BatchNorm2d, nn.InstanceNorm2d)) and module.affine:
        norm_flops *= 2
    if isinstance(module, nn.LayerNorm) and module.elementwise_affine:
        norm_flops *= 2
    return norm_flops


def compute_ReLU_flops(module, inp, out):
    assert isinstance(module, (nn.ReLU, nn.ReLU6, nn.PReLU, nn.ELU, nn.LeakyReLU, nn.GELU))
    batch_size = inp.size()[0]
    active_elements_count = batch_size
    for s in inp.size()[1:]:
        active_elements_count *= s
    return active_elements_count


def compute_Pool2d_flops(module, inp, out):
    assert isinstance(module, nn.MaxPool2d) or isinstance(module, nn.AvgPool2d)
    assert len(inp.size()) == 4 and len(inp.size()) == len(out.size())
    return np.prod(inp.shape).item()


def compute_Linear_flops(module, inp, out):
    assert isinstance(module, nn.Linear)
    batch_size = np.prod(inp.size()[:-1]).item()
    return batch_size * inp.size()[-1] * out.size()[-1]


def compute_Upsample_flops(module, inp, out):
    assert isinstance(module, nn.Upsample)
    output_size = out[0]
    batch_size = inp.size()[0]
    output_elements_count = batch_size
    for s in output_size.shape[1:]:
        output_elements_count *= s
    return output_elements_count


if __name__ == "__main__":
    main()
