# Supplementary material
Source: ML conference proceedings conference paper supplement (https://proceedings.neurips.cc/paper_files/paper/2022/hash/4d6938f94ab47d32128c239a4bfedae0-Abstract.html)
Supplement: Supplementary file 1 [file 4d6938f94ab47d32128c239a4bfedae0-Supplemental-Conference.zip › Supplementary material/src/train_model_assist.py]

import argparse
import copy
import datetime
import models
import os
import sys
import shutil
import time
import numpy as np
import torch
import torch.backends.cudnn as cudnn
from config import cfg
from data import fetch_dataset, make_data_loader, split_dataset
from metrics import Metric
from assist import Assist
from utils import save, load, process_control, process_dataset, resume
from logger import make_logger

cudnn.benchmark = True
parser = argparse.ArgumentParser(description='cfg')
for k in cfg:
    exec('parser.add_argument(\'--{0}\', default=cfg[\'{0}\'], type=type(cfg[\'{0}\']))'.format(k))
parser.add_argument('--control_name', default=None, type=str)
args = vars(parser.parse_args())
for k in cfg:
    cfg[k] = args[k]
if args['control_name']:
    cfg['control'] = {k: v for k, v in zip(cfg['control'].keys(), args['control_name'].split('_'))} \
        if args['control_name'] != 'None' else {}
cfg['control_name'] = '_'.join(
    [cfg['control'][k] for k in cfg['control'] if cfg['control'][k]]) if 'control' in cfg else ''


def main():
    process_control()
    seeds = list(range(cfg['init_seed'], cfg['init_seed'] + cfg['num_experiments']))
    for i in range(cfg['num_experiments']):
        model_tag_list = [str(seeds[i]), cfg['data_name'], cfg['model_name'], cfg['control_name']]
        cfg['model_tag'] = '_'.join([x for x in model_tag_list if x])
        print('Experiment: {}'.format(cfg['model_tag']))
        runExperiment()
    return


def runExperiment():
    cfg['seed'] = int(cfg['model_tag'].split('_')[0])
    torch.manual_seed(cfg['seed'])
    torch.cuda.manual_seed(cfg['seed'])
    dataset = fetch_dataset(cfg['data_name'])
    process_dataset(dataset)
    feature_split = split_dataset(cfg['num_users'])
    assist = Assist(feature_split)
    organization = assist.make_organization()
    metric = Metric({'train': ['Loss'], 'test': ['Loss']})
    if cfg['resume_mode'] == 1:
        result = resume(cfg['model_tag'])
        last_epoch = result['epoch']
        logger = result['logger']
        if last_epoch > 1:
            assist = result['assist']
            organization = result['organization']
        else:
            logger = make_logger(os.path.join('output', 'runs', 'train_{}'.format(cfg['model_tag'])))
    else:
        last_epoch = 1
        logger = make_logger(os.path.join('output', 'runs', 'train_{}'.format(cfg['model_tag'])))
    if organization is None:
        organization = assist.make_organization()
    if last_epoch == 1:
        initialize(dataset, assist, organization[0], metric, logger, 0)
    for epoch in range(last_epoch, cfg['global']['num_epochs'] + 1):
        logger.safe(True)
        data_loader = assist.broadcast(dataset, epoch)
        train(data_loader, organization, metric, logger, epoch)
        organization_outputs = gather(data_loader, organization, epoch)
        assist.update(organization_outputs, epoch)
        test(assist, metric, logger, epoch)
        logger.safe(False)
        save_result = {'cfg': cfg, 'epoch': epoch + 1, 'assist': assist, 'organization': organization, 'logger': logger}
        save(save_result, './output/model/{}_checkpoint.pt'.format(cfg['model_tag']))
        if metric.compare(logger.mean['test/{}'.format(metric.pivot_name)]):
            metric.update(logger.mean['test/{}'.format(metric.pivot_name)])
            shutil.copy('./output/model/{}_checkpoint.pt'.format(cfg['model_tag']),
                        './output/model/{}_best.pt'.format(cfg['model_tag']))
        logger.reset()
    logger.safe(False)
    return


def initialize(dataset, assist, organization, metric, logger, epoch):
    logger.safe(True)
    initialization = organization.initialize(dataset, metric, logger)
    info = {'info': ['Model: {}'.format(cfg['model_tag']),
                     'Train Epoch: {}'.format(epoch), 'ID: 1']}
    logger.append(info, 'train', mean=False)
    print(logger.write('train', metric.metric_name['train']))
    info = {'info': ['Model: {}'.format(cfg['model_tag']), 'Test Epoch: {}({:.0f}%)'.format(epoch, 100.)]}
    logger.append(info, 'test', mean=False)
    print(logger.write('test', metric.metric_name['test']))
    for split in dataset:
        assist.organization_output[0][split] = initialization[split]
        if cfg['data_name'] in ['MIMICL', 'MIMICM']:
            assist.organization_target[0][split] = torch.tensor(np.concatenate(dataset[split].target, axis=0))
        else:
            assist.organization_target[0][split] = torch.tensor(dataset[split].target)
    logger.safe(False)
    logger.reset()
    return


def train(data_loader, organization, metric, logger, epoch):
    start_time = time.time()
    num_organizations = len(organization)
    for i in range(num_organizations):
        organization[i].train(epoch, data_loader[i]['train'], metric, logger)
        if i % int((num_organizations * cfg['log_interval']) + 1) == 0:
            local_time = (time.time() - start_time) / (i + 1)
            epoch_finished_time = datetime.timedelta(seconds=local_time * (num_organizations - i - 1))
            exp_finished_time = epoch_finished_time + datetime.timedelta(
                seconds=round((cfg['global']['num_epochs'] - epoch) * local_time * num_organizations))
            info = {'info': ['Model: {}'.format(cfg['model_tag']),
                             'Train Epoch: {}({:.0f}%)'.format(epoch, 100. * i / num_organizations),
                             'ID: {}/{}'.format(i + 1, num_organizations),
                             'Epoch Finished Time: {}'.format(epoch_finished_time),
                             'Experiment Finished Time: {}'.format(exp_finished_time)]}
            logger.append(info, 'train', mean=False)
            print(logger.write('train', metric.metric_name['train']))
    return


def gather(data_loader, organization, epoch):
    with torch.no_grad():
        num_organizations = len(organization)
        organization_outputs = [{split: None for split in data_loader[i]} for i in range(num_organizations)]
        for i in range(num_organizations):
            for split in organization_outputs[i]:
                organization_outputs[i][split] = organization[i].predict(epoch, data_loader[i][split])['target']
    return organization_outputs


def test(assist, metric, logger, epoch):
    with torch.no_grad():
        input_size = assist.organization_target[0]['test'].size(0)
        input = {'target': assist.organization_target[0]['test']}
        output = {'target': assist.organization_output[epoch]['test']}
        output['loss'] = models.loss_fn(output['target'], input['target'])
        if cfg['data_name'] in ['MIMICM']:
            mask = input['target'] != -65535
            output['target'] = output['target'].softmax(dim=-1)[:, 1]
            output['target'], input['target'] = output['target'][mask], input['target'][mask]
        evaluation = metric.evaluate(metric.metric_name['test'], input, output)
        logger.append(evaluation, 'test', n=input_size)
        info = {'info': ['Model: {}'.format(cfg['model_tag']), 'Test Epoch: {}({:.0f}%)'.format(epoch, 100.)]}
        logger.append(info, 'test', mean=False)
        print(logger.write('test', metric.metric_name['test']))
    return


if __name__ == "__main__":
    main()
