# Supplementary material
Source: ML conference proceedings conference paper supplement (https://proceedings.neurips.cc/paper_files/paper/2022/hash/4d6938f94ab47d32128c239a4bfedae0-Abstract.html)
Supplement: Supplementary file 1 [file 4d6938f94ab47d32128c239a4bfedae0-Supplemental-Conference.zip › Supplementary material/src/train_model_vfl.py]

import argparse
import datetime
import models
import numpy as np
import os
import sys
import shutil
import time
import torch
import torch.backends.cudnn as cudnn
from config import cfg
from data import fetch_dataset, make_data_loader, split_dataset
from metrics import Metric
from utils import save, to_device, process_control, process_dataset, make_optimizer, make_scheduler, resume, collate
from logger import make_logger

cudnn.benchmark = True
parser = argparse.ArgumentParser(description='cfg')
for k in cfg:
    exec('parser.add_argument(\'--{0}\', default=cfg[\'{0}\'], type=type(cfg[\'{0}\']))'.format(k))
parser.add_argument('--control_name', default=None, type=str)
args = vars(parser.parse_args())
for k in cfg:
    cfg[k] = args[k]
if args['control_name']:
    cfg['control'] = {k: v for k, v in zip(cfg['control'].keys(), args['control_name'].split('_'))} \
        if args['control_name'] != 'None' else {}
cfg['control_name'] = '_'.join(
    [cfg['control'][k] for k in cfg['control'] if cfg['control'][k]]) if 'control' in cfg else ''


def main():
    process_control()
    seeds = list(range(cfg['init_seed'], cfg['init_seed'] + cfg['num_experiments']))
    for i in range(cfg['num_experiments']):
        model_tag_list = [str(seeds[i]), cfg['data_name'], cfg['model_name'], cfg['control_name']]
        cfg['model_tag'] = '_'.join([x for x in model_tag_list if x])
        print('Experiment: {}'.format(cfg['model_tag']))
        runExperiment()
    return


def runExperiment():
    cfg['seed'] = int(cfg['model_tag'].split('_')[0])
    torch.manual_seed(cfg['seed'])
    torch.cuda.manual_seed(cfg['seed'])
    dataset = fetch_dataset(cfg['data_name'])
    process_dataset(dataset)
    feature_split = split_dataset(cfg['num_users'])
    data_loader = make_data_loader(dataset, cfg['model_name'])
    model = eval('models.{}().to(cfg["device"])'.format(cfg['model_name']))
    optimizer = make_optimizer(model, cfg['model_name'])
    scheduler = make_scheduler(optimizer, cfg['model_name'])
    metric = Metric({'train': ['Loss'], 'test': ['Loss']})
    if cfg['resume_mode'] == 1:
        result = resume(cfg['model_tag'])
        last_epoch = result['epoch']
        if last_epoch > 1:
            feature_split = result['feature_split']
            model.load_state_dict(result['model_state_dict'])
            optimizer.load_state_dict(result['optimizer_state_dict'])
            scheduler.load_state_dict(result['scheduler_state_dict'])
            logger = result['logger']
        else:
            logger = make_logger(os.path.join('output', 'runs', 'train_{}'.format(cfg['model_tag'])))
    else:
        last_epoch = 1
        logger = make_logger(os.path.join('output', 'runs', 'train_{}'.format(cfg['model_tag'])))
    if cfg['world_size'] > 1:
        model = torch.nn.DataParallel(model, device_ids=list(range(cfg['world_size'])))
    for epoch in range(last_epoch, cfg[cfg['model_name']]['num_epochs'] + 1):
        logger.safe(True)
        train(data_loader['train'], feature_split, model, optimizer, metric, logger, epoch)
        test(data_loader['test'], feature_split, model, metric, logger, epoch)
        scheduler.step()
        logger.safe(False)
        model_state_dict = model.module.state_dict() if cfg['world_size'] > 1 else model.state_dict()
        result = {'cfg': cfg, 'epoch': epoch + 1, 'feature_split': feature_split,
                  'model_state_dict': model_state_dict, 'optimizer_state_dict': optimizer.state_dict(),
                  'scheduler_state_dict': scheduler.state_dict(), 'logger': logger}
        save(result, './output/model/{}_checkpoint.pt'.format(cfg['model_tag']))
        if metric.compare(logger.mean['test/{}'.format(metric.pivot_name)]):
            metric.update(logger.mean['test/{}'.format(metric.pivot_name)])
            shutil.copy('./output/model/{}_checkpoint.pt'.format(cfg['model_tag']),
                        './output/model/{}_best.pt'.format(cfg['model_tag']))
        logger.reset()
    logger.safe(False)
    return


def train(data_loader, feature_split, model, optimizer, metric, logger, epoch):
    model.train(True)
    start_time = time.time()
    for i, input in enumerate(data_loader):
        input = collate(input)
        input_size = input['data'].size(0)
        organization_idx = list(range(len(feature_split)))
        # while len(organization_idx) != 0:
        sampled_size = min(len(organization_idx), int(np.ceil(cfg['num_users'] * cfg['active_rate'])))
        sampled_idx = np.random.choice(organization_idx, sampled_size, replace=False)
        organization_idx = list(set(organization_idx) - set(sampled_idx))
        feature_split_i = [None for _ in range(len(feature_split))]
        for s in sampled_idx:
            feature_split_i[s] = feature_split[s]
        input['feature_split'] = feature_split_i
        input = to_device(input, cfg['device'])
        optimizer.zero_grad()
        output = model(input)
        output['loss'] = output['loss'].mean() if cfg['world_size'] > 1 else output['loss']
        output['loss'].backward()
        torch.nn.utils.clip_grad_norm_(model.parameters(), 1)
        optimizer.step()
        evaluation = metric.evaluate(metric.metric_name['train'], input, output)
        logger.append(evaluation, 'train', n=input_size)
        if i % int((len(data_loader) * cfg['log_interval']) + 1) == 0:
            batch_time = (time.time() - start_time) / (i + 1)
            lr = optimizer.param_groups[0]['lr']
            epoch_finished_time = datetime.timedelta(seconds=round(batch_time * (len(data_loader) - i - 1)))
            exp_finished_time = epoch_finished_time + datetime.timedelta(
                seconds=round((cfg[cfg['model_name']]['num_epochs'] - epoch) * batch_time * len(data_loader)))
            info = {'info': ['Model: {}'.format(cfg['model_tag']),
                             'Train Epoch: {}({:.0f}%)'.format(epoch, 100. * i / len(data_loader)),
                             'Learning rate: {:.6f}'.format(lr), 'Epoch Finished Time: {}'.format(epoch_finished_time),
                             'Experiment Finished Time: {}'.format(exp_finished_time)]}
            logger.append(info, 'train', mean=False)
            print(logger.write('train', metric.metric_name['train']))
    return


def test(data_loader, feature_split, model, metric, logger, epoch):
    with torch.no_grad():
        model.train(False)
        output_, target_ = [], []
        for i, input in enumerate(data_loader):
            input = collate(input)
            input_size = input['data'].size(0)
            input['feature_split'] = feature_split
            # input['buffer'] = 'test'
            input = to_device(input, cfg['device'])
            output = model(input)
            output['loss'] = output['loss'].mean() if cfg['world_size'] > 1 else output['loss']
            if cfg['data_name'] in ['MIMICM']:
                mask = input['target'] != -65535
                target_i = input['target']
                output_i = output['target'].softmax(dim=-1)[:, :, 1]
                output_i, target_i = output_i[mask], target_i[mask]
                output_.append(output_i.cpu())
                target_.append(target_i.cpu())
                evaluation = metric.evaluate([metric.metric_name['test'][0]], input, output)
                logger.append(evaluation, 'test', input_size)
            else:
                evaluation = metric.evaluate(metric.metric_name['test'], input, output)
                logger.append(evaluation, 'test', input_size)
        if cfg['data_name'] in ['MIMICM']:
            output_ = torch.cat(output_, dim=0).numpy()
            target_ = torch.cat(target_, dim=0).numpy()
            evaluation = metric.evaluate([metric.metric_name['test'][1]], {'target': target_}, {'target': output_})
            logger.append(evaluation, 'test', input_size)
        info = {'info': ['Model: {}'.format(cfg['model_tag']), 'Test Epoch: {}({:.0f}%)'.format(epoch, 100.)]}
        logger.append(info, 'test', mean=False)
        print(logger.write('test', metric.metric_name['test']))
    return


if __name__ == "__main__":
    main()
